# Supplementary material for: Investigation of the electrochemical and photoelectrochemical properties of Ni–Al LDH photocatalysts
Source: Royal Society of Chemistry journal article supplement (doi:10.1039/c6cp01646d), 2016-01-01
Supplement: c6cp01646d1.pdf [file c6cp01646d1.pdf]

## *Supporting Information*

for

### **Investigation on Electrochemical and Photoelectrochemical properties of Ni–Al LDH photocatalyst**

#### **Corresponding authors**

Prof. Kentaro Teramura and Prof. Tsunehiro Tanaka

Department of Molecular Engineering, Graduate School of Engineering, Kyoto  
University, Kyotodaigaku Katsura, Nishikyo-ku, Kyoto 615–8510, Japan

Tel: +81–75–383–2559 Fax: +81–75–383–2561

E-mail address: teramura@moleng.kyoto-u.ac.jp

#### **List of the authors**

Shoji IGUCHI<sup>a</sup>, Soichi KIKKAWA<sup>a</sup>, Kentaro TERAMURA<sup>a,b,c\*</sup>, Saburo  
HOSOKAWA<sup>a,b</sup>, and Tsunehiro TANAKA<sup>a,b\*</sup>

#### **Affiliation and full postal address**

- a. Department of Molecular Engineering, Graduate School of Engineering, Kyoto  
University, Kyotodaigaku Katsura, Nishikyo-ku, Kyoto 615–8510, Japan
- b. Elements Strategy Initiative for Catalysts & Batteries (ESICB), Kyoto University,  
1-30 Goryo-Ohara, Nishikyo-ku, Kyoto 615–8245, Japan
- c. Precursory Research for Embryonic Science and Technology (PRESTO), Japan  
Science and Technology Agency (JST), 4-1-8 Honcho, Kawaguchi, Saitama  
332–0012, Japan

**Table S1** Amounts of products evolved and the total number of consumed electrons in the photocatalytic conversion of CO<sub>2</sub> in water using the powder samples of Zn-Al, Mg-Al, and Ni-Al LDH. Photocatalytic reaction system: closed circulation system, photoirradiation time: 8 h, photocatalyst weight: 0.5 g, volume of reaction solution: 350 mL, light source: 400 W high pressure Hg lamp (quartz jacket). The selectivity toward CO evolution was calculated by  $100 \times (\text{CO} / (\text{CO} + \text{H}_2))$ .

| Photocatalyst | Amounts of products / $\mu\text{mol}$ |      | Total number of consumed electrons / $\mu\text{mol}$ | Selectivity toward CO evolution (%) |
|---------------|---------------------------------------|------|------------------------------------------------------|-------------------------------------|
|               | H <sub>2</sub>                        | CO   |                                                      |                                     |
| Zn-Al LDH     | 121.2                                 | 4.3  | 251.0                                                | 3.4                                 |
| Mg-Al LDH     | 47.4                                  | 2.5  | 99.8                                                 | 5.0                                 |
| Ni-Al LDH     | 10.3                                  | 19.8 | 60.2                                                 | 65.7                                |

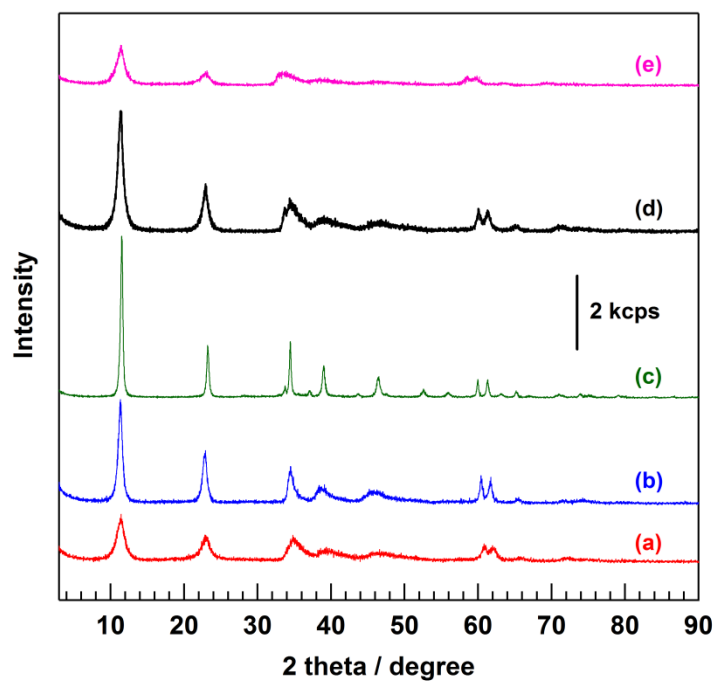

**Figure S1** XRD patterns of powder sample (a) Ni-Al, (b) Mg-Al, (c) Zn-Al, (d) Ni-Ga, (e) Ni-In LDH, synthesized via same procedure to that mentioned in main text.

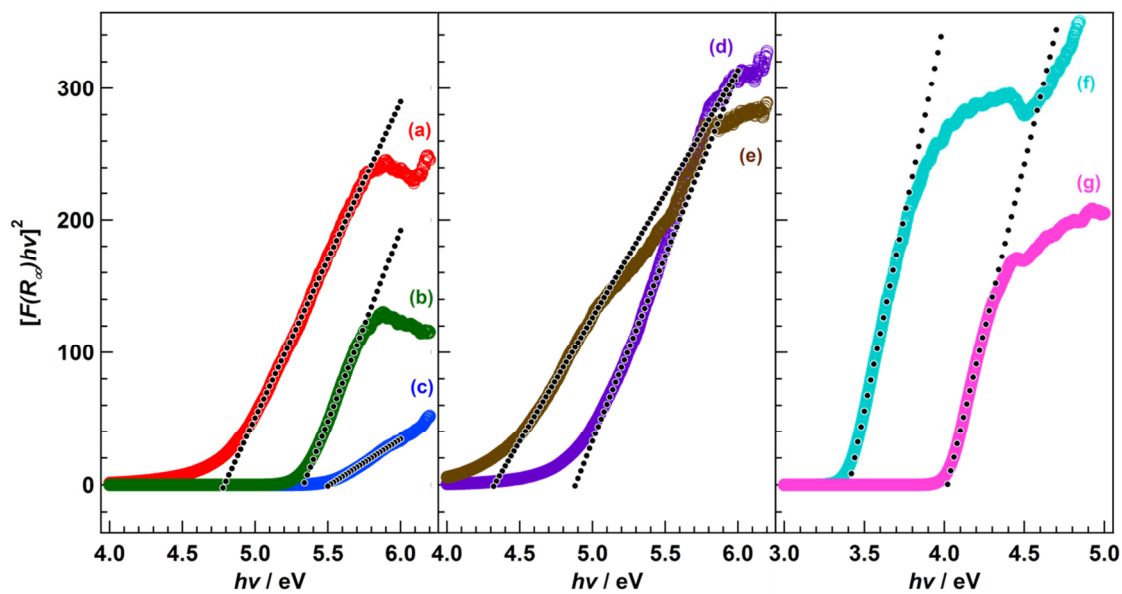

**Figure S2** Davis-Mott plot of (a) Ni–Al LDH, (b) Mg–Al LDH, (c) Zn–Al LDH, (d) Ni–Ga LDH, (e) Ni–In LDH, (f) TiO<sub>2</sub>, and (g) Ta<sub>2</sub>O<sub>5</sub> based on the results of UV/Vis diffused reflection spectra.

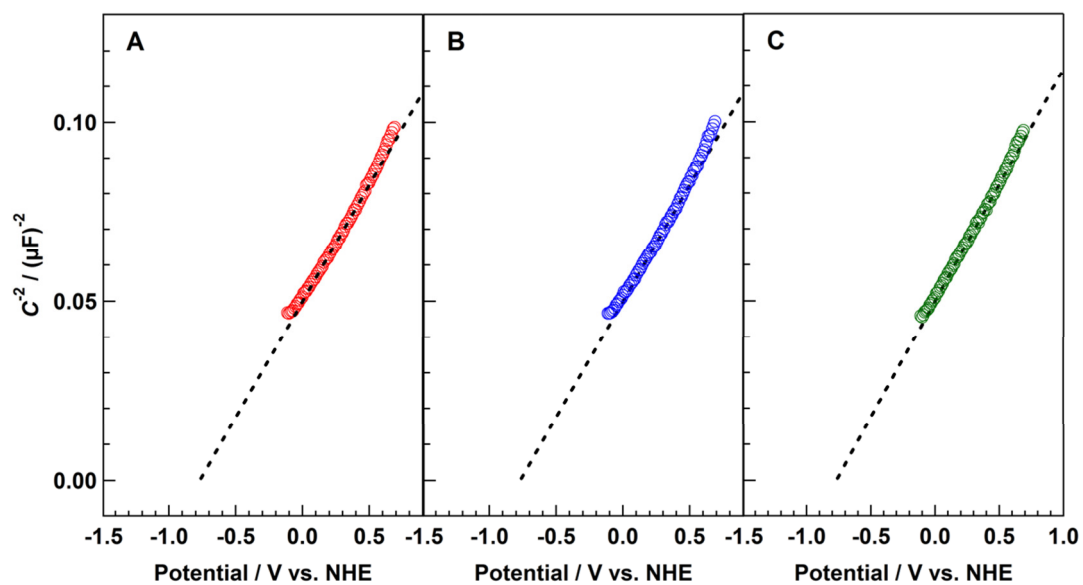

**Figure S3** Mott-Schottky plot for (A) Ni–Al LDH/FTO, (B) Mg–Al LDH/FTO, and (C) Zn–Al LDH/FTO based on the results of the impedance measurements at a frequency of 52.0 kHz. Electrochemical cell: X LDH/FTO working electrode, Ag/AgCl reference electrode, Pt wire counter electrode, and 0.1 M  $\text{Na}_2\text{SO}_4$  *aq.* electrolyte solution. Atmosphere: He.

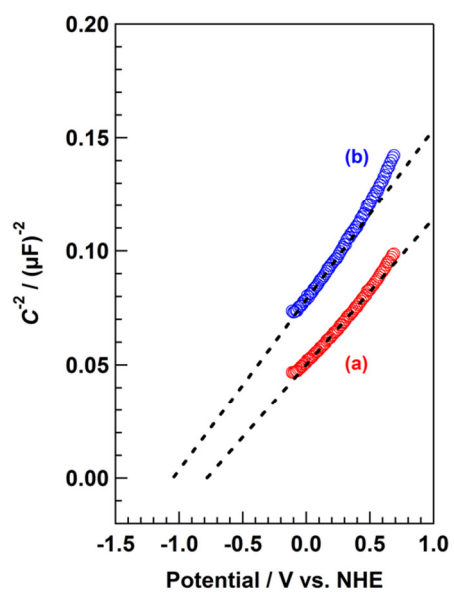

**Figure S4** Change of Mott-Schottky plot of Ni–Al LDH/FTO in accordance with the value of pH of the electrolyte solution. pH of the electrolyte solution: **(a)** 6.2 or **(b)** 12.7. Frequency: 52.0 kHz. Electrochemical cell: Ni–Al LDH/FTO working electrode, Ag/AgCl reference electrode, and Pt wire counter electrode. Atmosphere: He.
